# Supplementary material for: CUL4B promotes replication licensing by up-regulating the CDK2–CDC6 cascade
Source: PubMed Central journal article supplement — J Cell Biol. 2013 Mar 18;200(6):743–56. doi: 10.1083/jcb.201206065 (PMC3601365; doi:10.1083/jcb.201206065), 2013-03-18
Supplement: supp_jcb.201206065_JCB_201206065_sm.pdf [file supp_jcb.201206065_JCB_201206065_sm.pdf]

Zou et al., <http://www.jcb.org/cgi/content/full/jcb.201206065/DC1>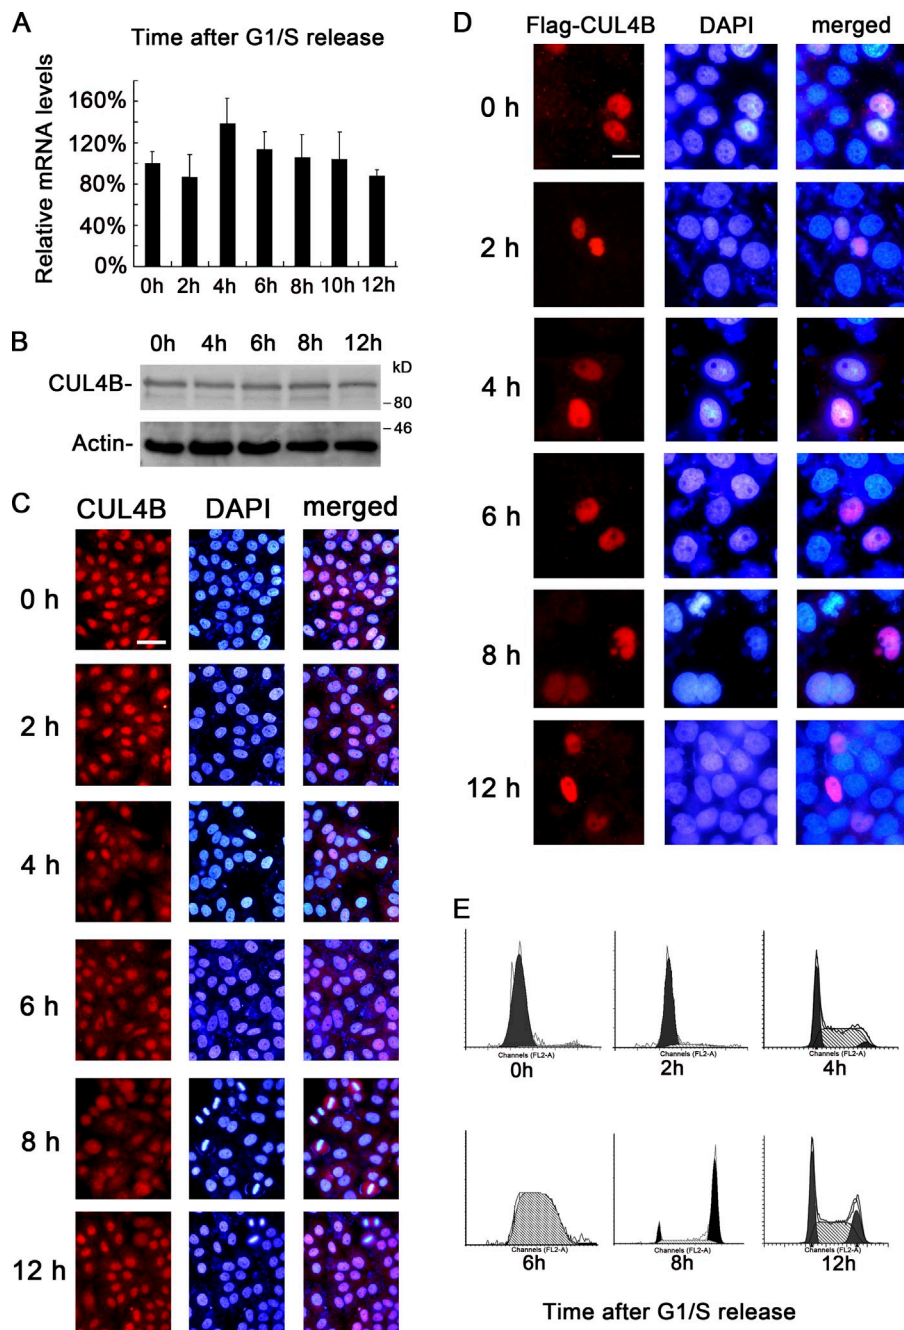

Figure S1. **Expression pattern and subcellular localization of human CUL4B during the cell cycle.** HeLa cells were synchronized with the double-thymidine block and released to progress through the cell cycle. Cells were harvested for isolation of total RNA and protein or immunostained with mouse anti-CUL4B or anti-Flag antibodies at the indicated number of hours after the release. (A) CUL4B mRNA expression was analyzed by real-time PCR. The expression levels were normalized to that of GAPDH in the same sample. The relative gene expression levels were also normalized to calibrator sample (0 h released from G1/S block), the value of which is 100%. The results are expressed as means  $\pm$  SE of three independent experiments. (B) Cells were synchronized and restimulated to enter the cell cycle as described above. Equal amounts of protein lysates were subjected to SDS-PAGE (12%) and then detected using the antibodies against CUL4B and  $\beta$ -actin, respectively. (C) HeLa cells grown on coverslips were immunostained with anti-CUL4B antibody and counterstained with DAPI for nuclei. Bar, 50  $\mu$ m. (D) HeLa cells transiently transfected with Flag-CUL4B construct were immunostained with anti-Flag antibody. Bar, 20  $\mu$ m. (E) After release from G1/S block, cells were processed at the indicated times for analysis of cell cycle distribution by flow cytometry. The data shown are from a representative of three independent experiments.

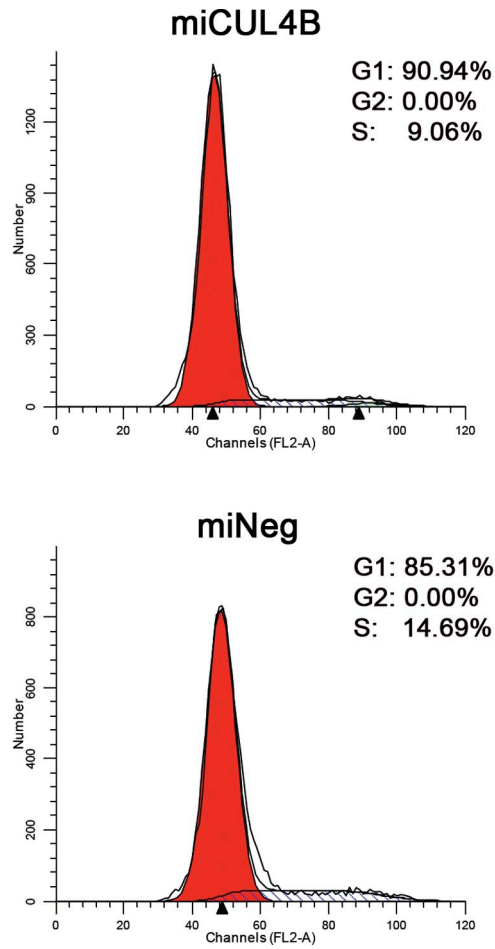

Figure S2. **Cell cycle analysis of synchronized miCUL4B and miNeg cells.** miCUL4B and miNeg cells were synchronized at the G1/S boundary using double-thymidine block and cell cycle distribution was analyzed by flow cytometry. The data shown are from a representative of three independent experiments.

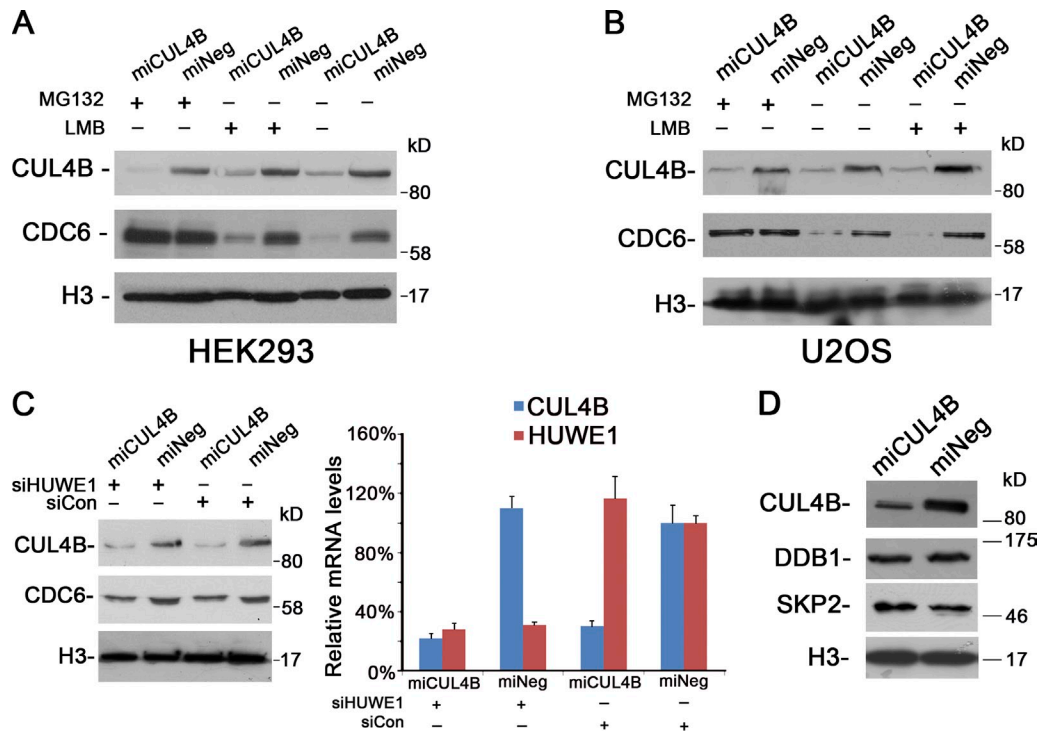

Figure S3. **CUL4B inhibits the proteasomal degradation of CDC6.** (A and B) miCUL4B and miNeg HEK293 (A) and U2OS (B) cells were treated or untreated with 30  $\mu$ M MG132 for 3 h or 10  $\mu$ M LMB for 5 h and nuclear proteins were extracted and analyzed by Western blot. (C) miCUL4B and miNeg HeLa cells were transfected with indicated siRNAs. 48 h after transfection, cells were treated with 0.5 mM mimosine for 22 h and nuclear proteins and total RNA was extracted and analyzed by Western blot (left) or real-time PCR (right). The normalized expression in miNeg cells transfected with siCon was set as 1. The assay was performed in triplicate, and relative means  $\pm$  SE are shown. (D) Nuclear proteins prepared from miCUL4B and miNeg cells were analyzed by Western blot.

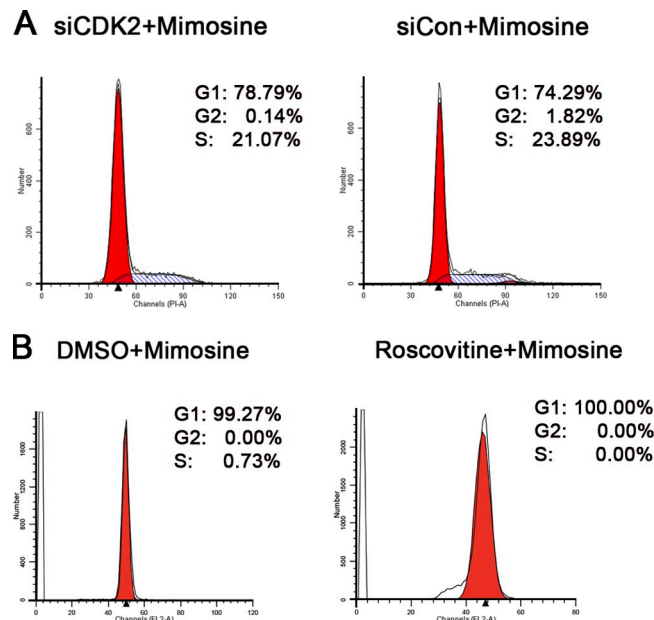

Figure S4. **Flow cytometry analysis of cells treated with mimosine.** (A) HeLa cells were transfected with indicated siRNAs. 48 h after transfection, cells were treated with 0.5 mM mimosine for 22 h and harvested for cell cycle analysis by flow cytometry. (B) HeLa cells arrested in G1 phase by mimosine were incubated further for 2 h in the presence of 0.5 mM mimosine plus 25  $\mu$ M roscovitine and harvested for cell cycle analysis by flow cytometry. The data shown are from a representative of three independent experiments.

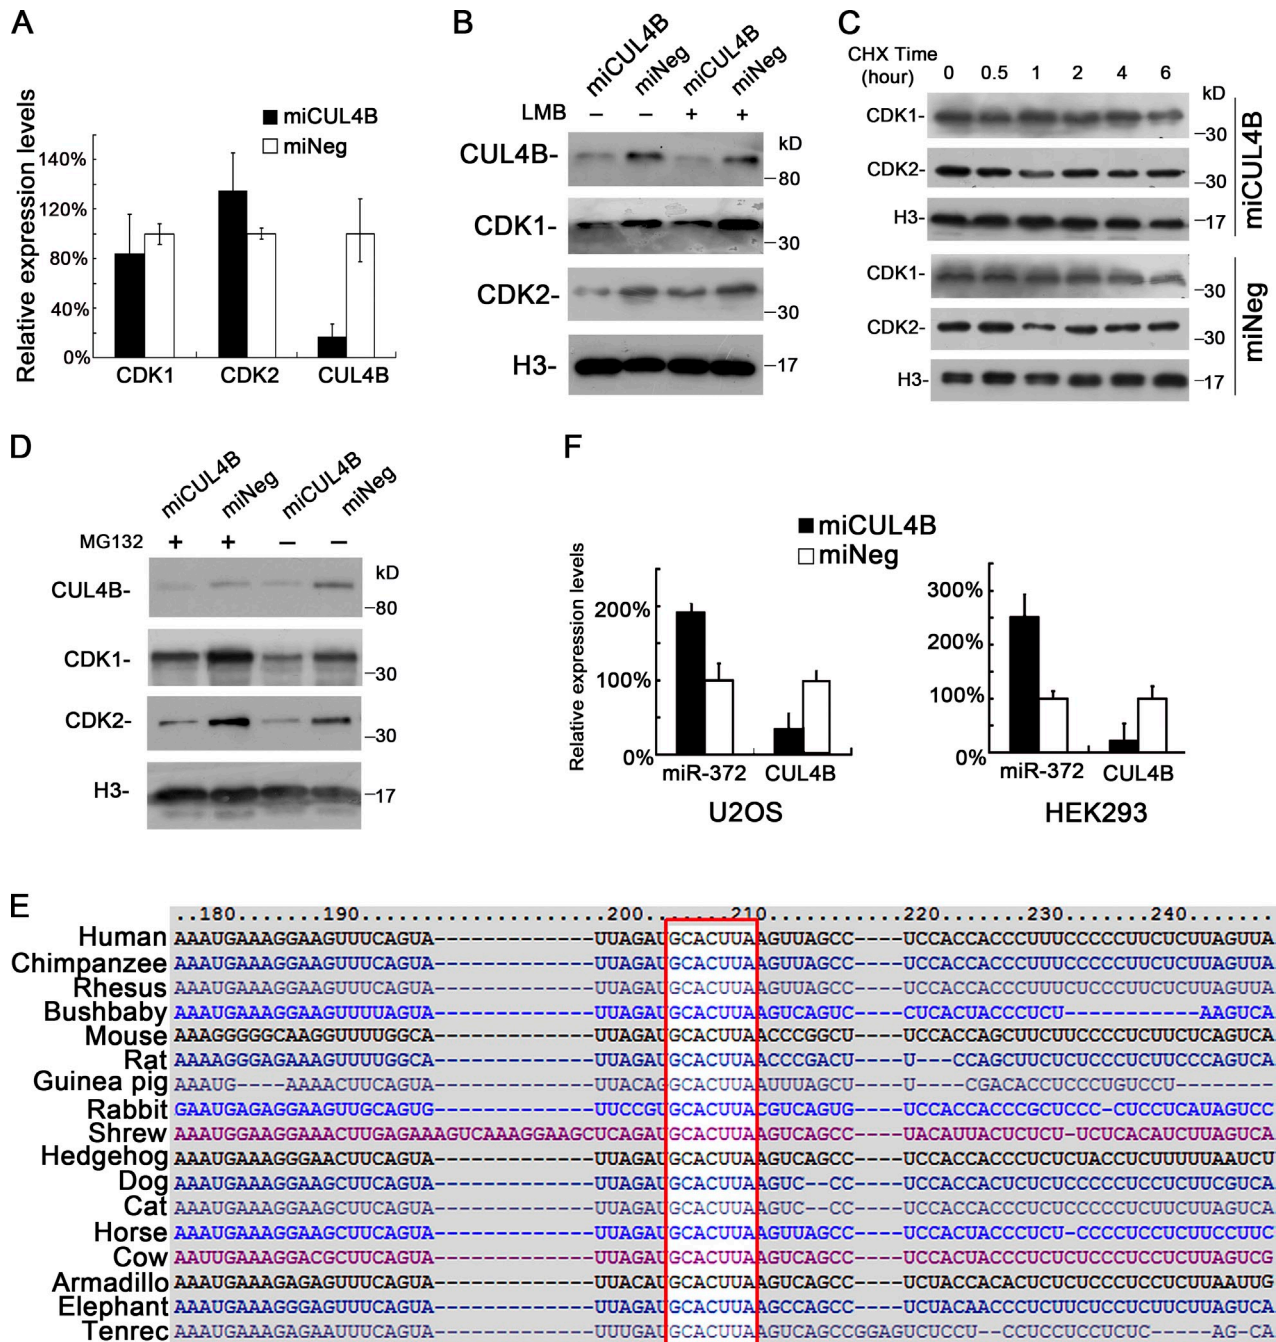

Figure S5. **CUL4B up-regulates CDK2 expression through repression of miR-372/373.** (A) The mRNA levels of CUL4B and CDK1/2 in miCUL4B and miNeg HeLa cells were measured by real-time PCR. The normalized expression in miNeg cells was set as 1. The assay was performed in triplicate, and relative means  $\pm$  SE are shown. (B) Indicated cells were treated or untreated with 10  $\mu$ M LMB for 5 h and nuclear proteins were analyzed by Western blot. (C) miCUL4B and miNeg HeLa cells were treated with 50  $\mu$ g/ml cycloheximide and harvested at the indicated time points. Equal amounts of nuclear proteins of the indicated cells were analyzed by Western blot. (D) miCUL4B and miNeg HeLa cells were treated or untreated with 30  $\mu$ M MG132 for 3 h and nuclear proteins were analyzed by Western blot. (E) A sequence alignment of the 3'-UTR of CDK2 with orthologues in different species was performed. Missing nucleotides are denoted by hyphens. The miR-372 binding site is boxed, and nucleotide numbers corresponding to the human sequence are also shown. (F) The levels of miR-372 in indicated cells were measured by real-time PCR. The normalized expression in miNeg cells was set as 1. The assay was performed in triplicate, and relative means  $\pm$  SE are shown.

Table S1. Primers used for real-time PCR

| Name                    | Primer sequence (5'→3')   |
|-------------------------|---------------------------|
| CUL4A forward           | CATCAACAAGAGACCCAACAAGC   |
| CUL4A reverse           | CCGTGGATAAACCTGAACAGGAT   |
| CUL4B forward           | TGGAAGTTCATTACCACCAGAGATG |
| CUL4B reverse           | TTCTGCTTTTAACACACAGTGCCTA |
| GAPDH forward           | CCAGGTGGTCTCCTCTGACTT     |
| GAPDH reverse           | GTTGCTGTAGCCAAATTCGTTGT   |
| CDC6 forward            | ACAAATGTCCAAACCGTAACCT    |
| CDC6 reverse            | GGTAAATGGGGAGTGTTCATA     |
| CDK1 forward            | AAACTACAGGTCAAGTGGTAGCC   |
| CDK1 reverse            | TCCTGCATAAGCACATCCTGA     |
| CDK2 forward            | CCAGGAGTTACTTCTATGCCTGA   |
| CDK2 reverse            | AATCCGCTTGTTAGGGTCGTA     |
| HUWE1 forward           | AGCTCTGACTAAGGGGTTATCT    |
| HUWE2 reverse           | GCATGAGGTGGTAGGGATACTT    |
| pri-miR-371-373 forward | CCTCAACAGCTCATCAAGGGCT    |
| pri-miR-371-373 reverse | TACCCGCCCTCACCCAATCAA     |

Table S2. Primers used for vector construction (restriction sites are underlined and mismatched bases are shown in bold)

| Name                                | Primer sequence (5'→3')             |
|-------------------------------------|-------------------------------------|
| pcDNA3.1/Myc-His B-CUL4A forward    | <u>CCAAGCTT</u> CCATGGCGGACGAGGCC   |
| pcDNA3.1/Myc-His B-CUL4A reverse    | <u>CGGGATCC</u> GGCCACGTAGTGGTACT   |
| pCMV-Tag 2B-CUL4A forward           | <u>CGGGATCC</u> ATGGCGGACGAGGCCCGC  |
| pCMV-Tag 2B-CUL4A reverse           | <u>CCCAAGCTT</u> GGCCACGTAGTGGTACTG |
| pcDNA3.1/Myc-His A-CUL4B forward    | CGCGGATCCATGTTTCCAACAGGTTT          |
| pcDNA3.1/Myc-His A-CUL4B reverse    | CCGCTCGAGTGCAATATAGTTGACTG          |
| pEGFP-C1-CUL4B 150-895 forward      | <u>CGGGGTACC</u> GCTTCGGTGCATCATGCA |
| pEGFP-C1-CUL4B 150-895 reverse      | CAGCCTGGTAGAGTTCTTCTAAAT            |
| pCMV-Tag 2B-CUL4B 150-895 forward   | <u>CGCGGATCC</u> GCTTCGGTGCATCATGCA |
| pCMV-Tag 2B-CUL4B 150-895 reverse   | CAGCCTGGTAGAGTTCTTCTAAAT            |
| <b>CUL4B RNAi-resistant plasmid</b> | <b>Primer sequence (5'→3')</b>      |
| Outer primer forward                | TATGGCAAGGATGTTTTGAGGC              |
| Outer primer reverse                | <u>CCGCTCGAG</u> TGCAATATAGTTGACTG  |
| Internal primer forward             | TCAGAA <b>CGTAC</b> CCGGAAATATG     |
| Outer primer reverse                | CAATATTTCC <b>GGTACG</b> TCTGA      |

Table S3. Primers used for reporter construction (restriction sites are underlined)

| Name                                | Primer sequence (5'→3')           |
|-------------------------------------|-----------------------------------|
| Pmir-GLO-CDK1-3'UTR forward         | <u>GAGCTCCTT</u> CTGACAAAAAGTTTC  |
| Pmir-GLO-CDK1-3'UTR reverse         | <u>CCGCTCGAG</u> AGTTTAATCCCAAAG  |
| Pmir-GLO-CDK2-3'UTR forward         | <u>GAGCTCCTT</u> CTTGAAGCCCCCAGC  |
| Pmir-GLO-CDK2-3'UTR reverse         | <u>CCGCTCGAG</u> AATGAGCTACAAACTA |
| Pmir-GLO-CDK2-3'UTR 372-Mut forward | AGTATTAGATATGCAGAAGTTAGCCTC       |
| Pmir-GLO-CDK2-3'UTR 372-Mut reverse | GAGGCTAACTTCTGCATATCTAATACT       |
